# Supplementary material
Source: PubMed Central journal article supplement (PMC6445196)
Supplement: Supp_Fig1.pdf [file Supp_Fig1.pdf]

## Supplementary Data

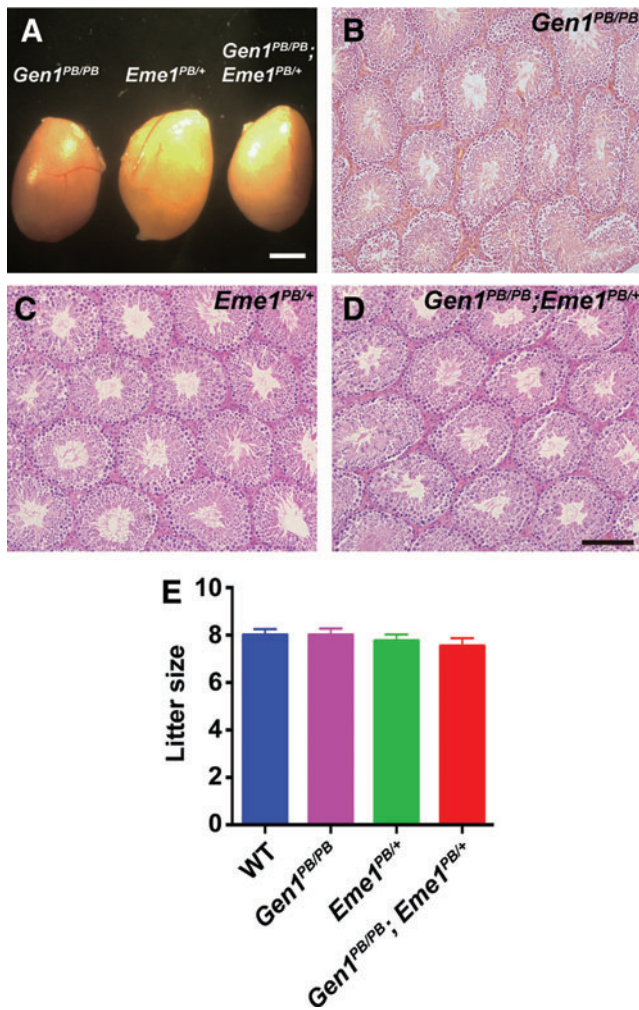

**SUPPLEMENTARY FIG. 1.** Histological analysis of the testis of *Gen1* and *Eme1* mutants. (A) Gross morphology of *Gen1<sup>PB/PB</sup>*, *Eme1<sup>PB/+</sup>*, and *Gen1<sup>PB/PB</sup>; Eme1<sup>PB/+</sup>* testis. Scale bar, 2 mm. (B–D) H&E-stained paraffin sections of *Gen1<sup>PB/PB</sup>*, *Eme1<sup>PB/+</sup>*, and *Gen1<sup>PB/PB</sup>; Eme1<sup>PB/+</sup>* testis. Scale bar, 40  $\mu$ m. (E) The litter size of mating between male mice of each genotype (WT, *Gen1<sup>PB/PB</sup>*, *Eme1<sup>PB/+</sup>*, and *Gen1<sup>PB/PB</sup>; Eme1<sup>PB/+</sup>*) and WT FVB/NJ females. PB, *piggyBac*; WT, wild-type.
